# Supplementary material for: Solvothermal synthesis of monodisperse iron oxides with various morphologies and their applications in removal of Cr(vi)
Source: Royal Society of Chemistry journal article supplement (doi:10.1039/c0ce00947d), 2011-01-01
Supplement: c0ce00947d.pdf [file c0ce00947d.pdf]

## Supporting Information

Lijuan Wan<sup>a,c</sup>, Shicheng Yan<sup>a,c</sup>, Xiangyan Wang<sup>b</sup>,

Zhaosheng Li<sup>\*a,b,c</sup>, Zhigang Zou<sup>\*a,c</sup>

<sup>a</sup>Ecomaterials and Renewable Energy Research Center (ERERC), Department of Physics, Nanjing University, Nanjing 210093, People's Republic of China

<sup>b</sup>Department of Materials Science and Engineering, Nanjing University, Nanjing 210093, People's Republic of China

<sup>c</sup>National Laboratory of Solid State Microstructures, Nanjing University, Nanjing 210093, People's Republic of China

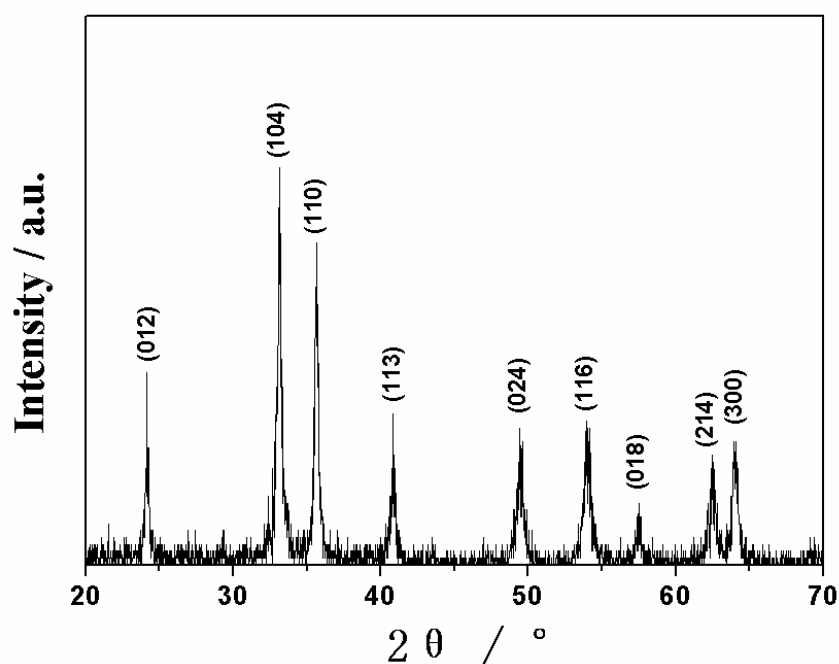

Fig. S1 XRD pattern of the sample after solvothermal reaction.

---

\* Corresponding author. Tel: +86-25-8368-6630; Fax: +86-25-8368-6632; E-mail: [zqli@nju.edu.cn](mailto:zqli@nju.edu.cn) (Z. Li) and [zgzou@nju.edu.cn](mailto:zgzou@nju.edu.cn) (Z. Zou).
